# Supplementary material
Source: Elsevier journal article supplement (https://www.sciencedirect.com/science/article/pii/S0021755719303286)
Supplement: mmc1 [file S0021755719303286:mmc1.docx]

**Appendix 1 - Original version of Youth Connectedness to Provider scale.**

| *1: How much do you feel that this doctor cares about you?* |
| --- |
| *2: How much do you feel that this doctor is someone you can talk to if you had a problem?* |
| *3: How much do you feel that this doctor listens to what you have to say?* |
| *4: How much do you feel that this doctor respects you as a person?* |
| *5: How much do you feel that this doctor was judging you?* |
| *6: How much do you trust that this doctor will keep what you tell him/her confidential (private)?* |
| *7: How much do you believe that what this doctor tells you is true?* |
| *Response options:*  *Not at all, A little, Somewhat, Quite a bit, Very much* |

**Appendix 2 - Final version of the *Escala de Avaliação de Vínculo entre Jovens e Profissionais de saúde*.**

| 1: *Quanto você sente que este médico se preocupa com você?* |
| --- |
| 2: *Quanto você sente que este médico é alguém com quem você pode conversar se tiver um problema?* |
| 3: *Quanto você sente que este médico escuta o que você tem a dizer?* |
| 4: *Quanto você sente que este médico respeita você como pessoa?* |
| 5: *Quanto você sente que este médico estava julgando você?* |
| 6: *Quanto você acha que este médico vai manter segredo (confidencial) sobre o que você conversou com ele/ela?* |
| 7: *Quanto você acredita que o que este médico lhe diz é verdade?* |
| *Opções de respostas:*  *Nada, Um pouco, Mais ou menos, Muito, Demais.* |
